# Supplementary material
Source: publisher figshare collection journal article supplement (https://aacr.figshare.com/articles/dataset/_/22478757)
Supplement: Supplementary file 1 [file 39930255]

## Safety and Immunogenicity of LY3415244, a Bispecific Antibody Against TIM-3 and PD-L1, in Patients With Advanced Solid Tumors

**Supplemental Table 1. Baseline Patient Demographics and Disease Characteristics**

|                                     | Cohort A1<br>(3 mg)<br>N = 3 | Cohort A2<br>(10 mg)<br>N = 3          | Cohort A3<br>(30 mg)<br>N = 3 | Cohort A4<br>(70 mg)<br>N = 3 |
|-------------------------------------|------------------------------|----------------------------------------|-------------------------------|-------------------------------|
| Sex, n                              |                              |                                        |                               |                               |
| Female                              | 2                            | 2                                      | 1                             | 1                             |
| Male                                | 1                            | 1                                      | 2                             | 2                             |
| Median age (range), years           | 52<br>(52-56)                | 52<br>(49-70)                          | 56<br>(25-64)                 | 54<br>(53-60)                 |
| Race, n                             |                              |                                        |                               |                               |
| Caucasian                           | 1                            | 2                                      | 3                             | 2                             |
| Asian                               | 2                            | 1                                      | 0                             | 1                             |
| Tumor type, n                       |                              |                                        |                               |                               |
| Breast cancer                       | 1 <sup>a</sup>               | 2 (1 <sup>a</sup> and 1 <sup>b</sup> ) | -                             | 1 <sup>c</sup>                |
| Non-small cell lung cancer          | 1 <sup>b</sup>               | 1 <sup>b</sup>                         | -                             | -                             |
| Rectal cancer                       | 1 <sup>b</sup>               | -                                      | -                             | 1 <sup>d</sup>                |
| Peritoneal sarcoma                  | -                            | -                                      | 1 <sup>b</sup>                | -                             |
| Desmoplastic small round cell tumor | -                            | -                                      | 1 <sup>d</sup>                | -                             |
| Ovarian cancer                      | -                            | -                                      | 1 <sup>e</sup>                | -                             |
| Ductal adenocarcinoma of pancreas   | -                            | -                                      | -                             | 1 <sup>d</sup>                |
| Prior anticancer therapies, n       |                              |                                        |                               |                               |
| Median number (IQR)                 | 5 (1-5)                      | 6 (1-9)                                | 4 (3-10)                      | 5 (4-10)                      |
| 1 prior line                        | 1                            | 1                                      | 0                             | 0                             |
| ≥3 prior lines                      | 2                            | 2                                      | 3                             | 3                             |
| Surgical procedure                  | 2                            | 2                                      | 3                             | 3                             |
| Radiotherapy                        | 0                            | 2                                      | 3                             | 3                             |
| Systemic therapy                    | 3                            | 3                                      | 3                             | 3                             |

N and n are numbers of patients.

Histopathological diagnosis grade: <sup>a</sup> poorly differentiated high grade, <sup>b</sup> unable to determine, <sup>c</sup> undifferentiated high grade, <sup>d</sup> well differentiated low grade, <sup>e</sup> not reported.
